# Supplementary material for: Influence of dairy matrix on the prebiotic effects of inulin related to gut metabolic activity and bone health
Source: Royal Society of Chemistry journal article supplement (doi:10.1039/d4fo01635a), 2024-01-01
Supplement: d4fo01635a1.pdf [file d4fo01635a1.pdf]

Table S1. Jejunal metabolite concentrations of rats fed milk or yogurt with/without inulin ( $\mu\text{mol/g}$ )

| Groups                 | Milk                     | MilkInu                   | Yogurt                    | YogurtInu                | p value |
|------------------------|--------------------------|---------------------------|---------------------------|--------------------------|---------|
| Acetate                | 4.263±1.057              | 4.962±0.628               | 5.299±0.532               | 5.206±0.846              | 0.79    |
| Acetone                | 0.016±0.003              | 0.013±0.001               | 0.017±0.002               | 0.014±0.001              | 0.36    |
| Alanine                | 2.413±0.331              | 1.949±0.239               | 2.669±0.405               | 1.874±0.217              | 0.23    |
| Aspartate              | 1.003±0.163a             | 0.607±0.095ab             | 0.486±0.088b              | 0.341±0.045b             | <0.001  |
| Butyrate               | 0.150±0.032              | 0.215±0.041               | 0.131±0.030               | 0.139±0.034              | 0.32    |
| Cholate                | 0.891±0.269              | 0.614±0.113               | 1.272±0.351               | 0.843±0.307              | 0.41    |
| Dimethylamine          | 0.059±0.008a             | 0.034±0.004b              | 0.045±0.005ab             | 0.040±0.019ab            | <0.05   |
| Ethanol                | 0.296±0.080              | 0.702±0.197               | 0.684±0.106               | 0.624±0.066              | 0.09    |
| Formate                | 4.782±0.860              | 5.186±0.732               | 5.287±0.827               | 3.811±0.548              | 0.50    |
| Fumarate               | 0.027±0.004              | 0.044±0.009               | 0.030±0.007               | 0.034±0.007              | 0.37    |
| Galactose              | 0.298±0.102              | 0.549±0.194               | 1.118±0.476               | 1.930±0.985              | 0.19    |
| Gallate                | 0.100±0.013 <sup>a</sup> | 0.062±0.009 <sup>ab</sup> | 0.064±0.011 <sup>ab</sup> | 0.037±0.007 <sup>b</sup> | <0.01   |
| Glucose                | 2.291±0.450              | 3.499±0.478               | 5.758±1.286               | 5.684±1.132              | <0.05   |
| Glutamate              | 3.216±0.309a             | 2.338±0.226ab             | 2.619±0.316ab             | 1.773±0.138b             | <0.01   |
| Glycine                | 2.693±0.325              | 2.130±0.092               | 2.402±0.368               | 2.163±0.285              | 0.49    |
| Isobutyrate            | 0.079±0.012              | 0.060±0.006               | 0.095±0.008               | 0.064±0.010              | <0.05   |
| Isoleucine             | 1.818±0.221              | 1.358±0.139               | 1.866±0.227               | 1.284±0.138              | 0.07    |
| Lactate                | 0.593±0.092              | 0.740±0.230               | 0.880±0.387               | 1.000±0.137              | 0.66    |
| Leucine                | 2.355±0.267ab            | 1.868±0.181ab             | 2.768±0.354a              | 1.615±0.197b             | <0.05   |
| Lysine                 | 1.782±0.244              | 1.144±0.109               | 1.757±0.284               | 1.137±0.158              | <0.05   |
| Malonate               | 0.306±0.071              | 0.331±0.089               | 0.695±0.136               | 0.495±0.143              | 0.08    |
| Methanol               | 1.304±0.035              | 1.296±0.056               | 1.380±0.034               | 1.299±0.039              | 0.44    |
| Methionine             | 0.706±0.090              | 0.485±0.056               | 0.654±0.115               | 0.462±0.054              | 0.11    |
| Phenylalanine          | 1.075±0.148              | 0.835±0.084               | 1.123±0.189               | 0.867±0.114              | 0.37    |
| Proline                | 1.612±0.182a             | 1.409±0.077ab             | 1.619±0.169a              | 1.005±0.069b             | <0.01   |
| Propionate             | 0.200±0.028a             | 0.118±0.010b              | 0.140±0.014ab             | 0.117±0.005b             | <0.01   |
| Succinate              | 0.048±0.010              | 0.035±0.005               | 0.031±0.004               | 0.024±0.005              | 0.09    |
| Threonine              | 1.056±0.152              | 1.385±0.157               | 1.213±0.199               | 1.395±0.213              | 0.51    |
| Trimethylamine N-oxide | 0.032±0.005ab            | 0.024±0.002a              | 0.044±0.010ab             | 0.066±0.018b             | <0.05   |
| Tryptophan             | 0.369±0.052              | 0.307±0.033               | 0.441±0.055               | 0.310±0.031              | 0.13    |
| Tyrosine               | 1.156±0.143              | 0.877±0.082               | 1.059±0.123               | 0.882±0.103              | 0.25    |
| Uracil                 | 0.206±0.028              | 0.197±0.028               | 0.231±0.040               | 0.225±0.018              | 0.83    |
| Valerate               | 0.069±0.009a             | 0.075±0.005a              | 0.090±0.006a              | 0.134±0.016b             | <0.001  |
| Valine                 | 2.092±0.261              | 1.848±0.179               | 2.259±0.285               | 1.658±0.176              | 0.28    |

Table S2. Cecal metabolite concentrations of rats fed milk or yogurt with/without inulin ( $\mu\text{mol/g}$ )

| Groups               | Milk                | MilkInu              | Yogurt              | YogurtInu           | p value |
|----------------------|---------------------|----------------------|---------------------|---------------------|---------|
| 4-                   | 0.046 $\pm$ 0.004a  | 0.021 $\pm$ 0.006b   | 0.050 $\pm$ 0.009a  | 0.021 $\pm$ 0.004b  | <0.01   |
| Hydroxyphenylacetate |                     |                      |                     |                     |         |
| Acetate              | 18.648 $\pm$ 1.673a | 22.032 $\pm$ 2.231ab | 19.644 $\pm$ 1.116a | 28.453 $\pm$ 2.459b | <0.01   |
| Acetone              | 0.048 $\pm$ 0.009a  | 0.021 $\pm$ 0.005b   | 0.037 $\pm$ 0.007ab | 0.022 $\pm$ 0.006ab | <0.05   |
| Alanine              | 0.622 $\pm$ 0.085   | 0.637 $\pm$ 0.040    | 0.580 $\pm$ 0.038   | 0.745 $\pm$ 0.066   | 0.28    |
| Aspartate            | 0.178 $\pm$ 0.039a  | 0.075 $\pm$ 0.016bc  | 0.156 $\pm$ 0.020ab | 0.048 $\pm$ 0.011c  | <0.01   |
| Butyrate             | 4.516 $\pm$ 0.519   | 5.514 $\pm$ 1.342    | 4.25 $\pm$ 0.299    | 5.132 $\pm$ 1.322   | 0.78    |
| Dimethylamine        | 0.015 $\pm$ 0.004a  | 0.004 $\pm$ 0.001b   | 0.005 $\pm$ 0.001b  | 0.002 $\pm$ 0.000b  | <0.001  |
| Ethanol              | 0.233 $\pm$ 0.030a  | 0.556 $\pm$ 0.148a   | 0.530 $\pm$ 0.088a  | 1.325 $\pm$ 0.346b  | <0.01   |
| Formate              | 0.039 $\pm$ 0.004ab | 0.014 $\pm$ 0.003ab  | 0.067 $\pm$ 0.028a  | 0.008 $\pm$ 0.001b  | <0.05   |
| Fumarate             | 0.022 $\pm$ 0.004a  | 0.011 $\pm$ 0.003ab  | 0.020 $\pm$ 0.005ab | 0.005 $\pm$ 0.001b  | <0.05   |
| Galactose            | 0.182 $\pm$ 0.054   | 0.229 $\pm$ 0.042    | 0.290 $\pm$ 0.100   | 0.276 $\pm$ 0.038   | 0.62    |
| Gallate              | 0.012 $\pm$ 0.003a  | 0.004 $\pm$ 0.001b   | 0.007 $\pm$ 0.001b  | 0.004 $\pm$ 0.001b  | <0.001  |
| Glucose              | 5.288 $\pm$ 0.792   | 8.107 $\pm$ 1.313    | 6.447 $\pm$ 0.761   | 8.170 $\pm$ 1.650   | 0.27    |
| Glutamate            | 1.638 $\pm$ 0.09a   | 0.732 $\pm$ 0.122b   | 1.495 $\pm$ 0.178a  | 0.379 $\pm$ 0.046b  | <0.001  |
| Glycine              | 0.803 $\pm$ 0.097a  | 0.38 $\pm$ 0.052b    | 0.850 $\pm$ 0.085a  | 0.322 $\pm$ 0.044b  | <0.001  |
| Isobutyrate          | 0.536 $\pm$ 0.055   | 0.494 $\pm$ 0.062    | 0.550 $\pm$ 0.066   | 0.403 $\pm$ 0.053   | 0.30    |
| Isoleucine           | 0.645 $\pm$ 0.038a  | 0.387 $\pm$ 0.060b   | 0.639 $\pm$ 0.035a  | 0.326 $\pm$ 0.027b  | <0.0001 |
| Lactate              | 0.173 $\pm$ 0.028ab | 0.133 $\pm$ 0.019a   | 0.288 $\pm$ 0.056b  | 0.077 $\pm$ 0.009a  | <0.001  |
| Leucine              | 0.898 $\pm$ 0.064a  | 0.515 $\pm$ 0.076b   | 0.909 $\pm$ 0.034a  | 0.382 $\pm$ 0.047b  | <0.0001 |
| Lysine               | 0.894 $\pm$ 0.064a  | 0.623 $\pm$ 0.086b   | 0.981 $\pm$ 0.043a  | 0.545 $\pm$ 0.048b  | <0.0001 |
| Malonate             | 0.030 $\pm$ 0.004   | 0.034 $\pm$ 0.012    | 0.035 $\pm$ 0.003   | 0.022 $\pm$ 0.002   | 0.50    |
| Methanol             | 1.351 $\pm$ 0.157   | 1.209 $\pm$ 0.036    | 1.227 $\pm$ 0.047   | 1.424 $\pm$ 0.073   | 0.30    |
| Methionine           | 0.306 $\pm$ 0.027a  | 0.197 $\pm$ 0.023b   | 0.303 $\pm$ 0.016a  | 0.162 $\pm$ 0.013b  | <0.0001 |
| Phenylalanine        | 0.474 $\pm$ 0.025a  | 0.337 $\pm$ 0.044b   | 0.553 $\pm$ 0.033a  | 0.321 $\pm$ 0.028b  | <0.0001 |
| Proline              | 0.637 $\pm$ 0.058a  | 0.378 $\pm$ 0.051b   | 0.658 $\pm$ 0.026a  | 0.185 $\pm$ 0.024c  | <0.0001 |
| Propionate           | 3.119 $\pm$ 0.224a  | 2.333 $\pm$ 0.453ab  | 3.362 $\pm$ 0.249a  | 1.404 $\pm$ 0.220b  | <0.001  |
| Succinate            | 0.2031 $\pm$ 0.070  | 0.057 $\pm$ 0.043    | 0.096 $\pm$ 0.034   | 0.031 $\pm$ 0.013   | <0.05   |
| Threonine            | 0.514 $\pm$ 0.085   | 0.325 $\pm$ 0.039    | 0.481 $\pm$ 0.060   | 0.355 $\pm$ 0.021   | 0.06    |
| Trimethylamine       | 0.012 $\pm$ 0.001ab | 0.008 $\pm$ 0.001bc  | 0.013 $\pm$ 0.001a  | 0.005 $\pm$ 0.001c  | <0.001  |
| Tryptophan           | 0.106 $\pm$ 0.010a  | 0.063 $\pm$ 0.007b   | 0.100 $\pm$ 0.009a  | 0.065 $\pm$ 0.005b  | <0.001  |
| Tyrosine             | 0.574 $\pm$ 0.035a  | 0.392 $\pm$ 0.058b   | 0.623 $\pm$ 0.028a  | 0.353 $\pm$ 0.029b  | <0.0001 |
| Uracil               | 0.289 $\pm$ 0.023   | 0.350 $\pm$ 0.034    | 0.396 $\pm$ 0.017   | 0.313 $\pm$ 0.037   | 0.07    |
| Valerate             | 0.549 $\pm$ 0.047ab | 0.420 $\pm$ 0.079ab  | 0.584 $\pm$ 0.031a  | 0.366 $\pm$ 0.042b  | <0.05   |
| Valine               | 1.123 $\pm$ 0.067a  | 0.669 $\pm$ 0.091b   | 1.122 $\pm$ 0.041a  | 0.550 $\pm$ 0.045b  | <0.0001 |

Table S3. Colonic metabolite concentrations of rats fed milk or yogurt with/without inulin (µmol/g)

| Groups                 | Milk         | MilkInu        | Yogurt        | YogurtInu     | p value |
|------------------------|--------------|----------------|---------------|---------------|---------|
| 3-Methyl-2-oxovalerate | 0.087±0.031  | 0.037±0.007    | 0.073±0.013   | 0.050±0.019   | 0.28    |
| 4-Hydroxyphenylacetate | 0.064±0.008a | 0.034±0.008b   | 0.071±0.008a  | 0.026±0.004b  | <0.0001 |
| Acetate                | 9.159±1.068a | 13.327±1.429ab | 9.691±1.190a  | 18.556±2.528b | <0.01   |
| Acetone                | 0.025±0.004  | 0.028±0.002    | 0.025±0.003   | 0.031±0.009   | 0.82    |
| Alanine                | 0.464±0.048a | 0.683±0.053ab  | 0.444±0.039a  | 0.884±0.123b  | <0.001  |
| Aspartate              | 0.188±0.020a | 0.062±0.013b   | 0.126±0.016c  | 0.058±0.014b  | <0.0001 |
| Butyrate               | 1.210±0.237  | 0.941±0.156    | 1.509±0.335   | 1.277±0.254   | 0.48    |
| Cholate                |              |                |               |               |         |
| Dimethylamine          | 0.006±0.001  | 0.009±0.003    | 0.007±0.001   | 0.010±0.002   | 0.50    |
| Ethanol                | 0.162±0.022a | 0.333±0.061ab  | 0.210±0.033a  | 0.556±0.162b  | <0.05   |
| Formate                | 0.049±0.008  | 0.014±0.004    | 0.041±0.014   | 0.022±0.009   | <0.05   |
| Fumarate               | 0.025±0.005a | 0.008±0.002b   | 0.023±0.003a  | 0.007±0.003b  | <0.001  |
| Galactose              | 0.204±0.075  | 0.235±0.040    | 0.308±0.057   | 0.201±0.023   | 0.45    |
| Glucose                | 3.051±0.561  | 4.504±1.072    | 3.846±0.713   | 3.701±1.203   | 0.74    |
| Glutamate              | 1.157±0.161a | 0.554±0.068b   | 1.159±0.206a  | 0.667±0.159ab | <0.01   |
| Glycine                | 0.626±0.068  | 0.383±0.065    | 0.549±0.091   | 0.410±0.080   | 0.10    |
| Isobutyrate            | 0.253±0.036  | 0.251±0.046    | 0.363±0.059   | 0.188±0.036   | 0.07    |
| Isoleucine             | 0.357±0.052  | 0.270±0.032    | 0.327±0.048   | 0.230±0.031   | 0.16    |
| Lactate                | 0.094±0.015  | 0.100±0.017    | 0.124±0.020   | 0.102±0.018   | 0.65    |
| Leucine                | 0.576±0.058a | 0.386±0.056ab  | 0.509±0.061a  | 0.274±0.054b  | <0.01   |
| Lysine                 | 0.696±0.072  | 0.579±0.072    | 0.665±0.094   | 0.640±0.085   | 0.78    |
| Malonate               | 0.052±0.014  | 0.061±0.016    | 0.091±0.022   | 0.045±0.007   | 0.19    |
| Methanol               | 0.997±0.049a | 1.060±0.050a   | 1.042±0.060a  | 1.334±0.062b  | <0.001  |
| Methionine             | 0.186±0.018  | 0.144±0.015    | 0.170±0.023   | 0.137±0.017   | 0.23    |
| Phenylalanine          | 0.328±0.035  | 0.284±0.033    | 0.310±0.040   | 0.271±0.029   | 0.65    |
| Proline                | 0.353±0.038  | 0.341±0.035    | 0.340±0.035   | 0.302±0.038   | 0.77    |
| Propionate             | 1.571±0.245  | 0.754±0.158    | 1.702±0.325   | 0.814±0.205   | <0.05   |
| Succinate              | 0.065±0.028  | 0.032±0.018    | 0.027±0.008   | 0.021±0.003   | 0.29    |
| Threonine              | 0.383±0.043  | 0.296±0.027    | 0.374±0.068   | 0.354±0.036   | 0.55    |
| Trimethylamine         | 0.009±0.002  | 0.008±0.002    | 0.009±0.002   | 0.005±0.001   | 0.31    |
| Tryptophan             | 0.061±0.007  | 0.069±0.010    | 0.064±0.006   | 0.075±0.016   | 0.78    |
| Tyrosine               | 0.392±0.037  | 0.333±0.034    | 0.353±0.048   | 0.307±0.028   | 0.44    |
| Uracil                 | 0.377±0.083  | 0.362±0.066    | 0.612±0.122   | 0.474±0.086   | 0.21    |
| Valerate               | 0.210±0.052a | 0.149±0.024a   | 0.318±0.056ab | 0.412±0.057b  | <0.01   |
| Valine                 | 0.593±0.069  | 0.475±0.059    | 0.509±0.085   | 0.465±0.058   | 0.55    |

Table S4. Fecal metabolite concentrations of rats fed milk or yogurt with/without inulin ( $\mu\text{mol/g}$ )

| Groups               | Milk                | MilkInu              | Yogurt              | YogurtInu           | p value |
|----------------------|---------------------|----------------------|---------------------|---------------------|---------|
| 4-                   | 0.066 $\pm$ 0.015   | 0.049 $\pm$ 0.011    | 0.079 $\pm$ 0.014   | 0.038 $\pm$ 0.003   | 0.09    |
| Hydroxyphenylacetate |                     |                      |                     |                     |         |
| Acetate              | 8.282 $\pm$ 1.043a  | 17.110 $\pm$ 2.279ab | 9.617 $\pm$ 2.284a  | 23.789 $\pm$ 3.387b | <0.001  |
| Acetone              | 0.064 $\pm$ 0.025   | 0.050 $\pm$ 0.010    | 0.098 $\pm$ 0.023   | 0.060 $\pm$ 0.008   | 0.29    |
| Alanine              | 1.395 $\pm$ 0.144   | 2.035 $\pm$ 0.380    | 1.396 $\pm$ 0.106   | 1.656 $\pm$ 0.228   | 0.21    |
| Aspartate            | 0.262 $\pm$ 0.037   | 0.179 $\pm$ 0.042    | 0.222 $\pm$ 0.031   | 0.161 $\pm$ 0.010   | 0.14    |
| Butyrate             | 1.188 $\pm$ 0.208   | 1.784 $\pm$ 0.466    | 0.738 $\pm$ 0.148   | 1.123 $\pm$ 0.212   | 0.10    |
| Cholate              |                     |                      |                     |                     |         |
| Dimethylamine        | 0.011 $\pm$ 0.002   | 0.016 $\pm$ 0.004    | 0.012 $\pm$ 0.002   | 0.017 $\pm$ 0.002   | 0.27    |
| Ethanol              | 0.140 $\pm$ 0.013a  | 0.328 $\pm$ 0.047ab  | 0.152 $\pm$ 0.015a  | 0.593 $\pm$ 0.142b  | <0.001  |
| Formate              | 0.072 $\pm$ 0.010a  | 0.018 $\pm$ 0.008b   | 0.035 $\pm$ 0.006b  | 0.014 $\pm$ 0.003b  | <0.0001 |
| Fumarate             | 0.030 $\pm$ 0.008ab | 0.012 $\pm$ 0.002ab  | 0.036 $\pm$ 0.010a  | 0.009 $\pm$ 0.001b  | <0.05   |
| Galactose            | 0.786 $\pm$ 0.119a  | 0.435 $\pm$ 0.070bc  | 0.536 $\pm$ 0.097b  | 0.149 $\pm$ 0.038c  | <0.001  |
| Glucose              | 3.674 $\pm$ 0.683ab | 6.715 $\pm$ 1.730a   | 2.546 $\pm$ 0.547b  | 0.961 $\pm$ 0.235b  | <0.01   |
| Glutamate            | 1.763 $\pm$ 0.240a  | 0.959 $\pm$ 0.216a   | 1.479 $\pm$ 0.270ab | 0.443 $\pm$ 0.067b  | <0.001  |
| Glycine              | 1.077 $\pm$ 0.142a  | 0.645 $\pm$ 0.179ab  | 0.790 $\pm$ 0.167ab | 0.360 $\pm$ 0.015b  | <0.05   |
| Isobutyrate          | 0.191 $\pm$ 0.046   | 0.312 $\pm$ 0.047    | 0.226 $\pm$ 0.039   | 0.246 $\pm$ 0.027   | 0.22    |
| Isoleucine           | 0.582 $\pm$ 0.073a  | 0.442 $\pm$ 0.118ab  | 0.425 $\pm$ 0.073ab | 0.217 $\pm$ 0.025b  | <0.05   |
| Lactate              | 0.182 $\pm$ 0.049   | 0.158 $\pm$ 0.053    | 0.225 $\pm$ 0.029   | 0.108 $\pm$ 0.032   | 0.28    |
| Leucine              | 0.858 $\pm$ 0.091a  | 0.530 $\pm$ 0.149ab  | 0.688 $\pm$ 0.094ab | 0.303 $\pm$ 0.040b  | <0.01   |
| Lysine               | 0.975 $\pm$ 0.140   | 0.880 $\pm$ 0.172    | 0.813 $\pm$ 0.135   | 0.756 $\pm$ 0.100   | 0.72    |
| Malonate             | 0.123 $\pm$ 0.020a  | 0.132 $\pm$ 0.030a   | 0.028 $\pm$ 0.008b  | 0.044 $\pm$ 0.010b  | <0.001  |
| Methanol             | 1.207 $\pm$ 0.176   | 1.687 $\pm$ 0.304    | 1.061 $\pm$ 0.129   | 1.114 $\pm$ 0.252   | 0.21    |
| Methionine           | 0.279 $\pm$ 0.033   | 0.232 $\pm$ 0.049    | 0.263 $\pm$ 0.036   | 0.156 $\pm$ 0.013   | 0.09    |
| Oxypurinol           | 5.801 $\pm$ 0.615ab | 5.986 $\pm$ 1.783a   | 4.794 $\pm$ 0.564ab | 2.144 $\pm$ 0.255b  | <0.05   |
| Phenylalanine        | 0.483 $\pm$ 0.082   | 0.404 $\pm$ 0.091    | 0.428 $\pm$ 0.063   | 0.288 $\pm$ 0.049   | 0.30    |
| Proline              | 0.558 $\pm$ 0.063   | 0.573 $\pm$ 0.100    | 0.570 $\pm$ 0.101   | 0.639 $\pm$ 0.077   | 0.91    |
| Propionate           | 1.137 $\pm$ 0.156ab | 0.833 $\pm$ 0.251ab  | 1.356 $\pm$ 0.269a  | 0.490 $\pm$ 0.108b  | <0.05   |
| Succinate            | 0.025 $\pm$ 0.005   | 0.021 $\pm$ 0.003    | 0.026 $\pm$ 0.010   | 0.025 $\pm$ 0.004   | 0.95    |
| Threonine            | 0.766 $\pm$ 0.103   | 0.613 $\pm$ 0.104    | 0.499 $\pm$ 0.080   | 0.441 $\pm$ 0.060   | 0.07    |
| Trimethylamine       | 0.008 $\pm$ 0.001   | 0.015 $\pm$ 0.004    | 0.009 $\pm$ 0.003   | 0.009 $\pm$ 0.001   | 0.20    |
| Tryptophan           | 0.123 $\pm$ 0.007a  | 0.124 $\pm$ 0.011a   | 0.081 $\pm$ 0.009b  | 0.137 $\pm$ 0.015a  | <0.01   |
| Tyrosine             | 0.611 $\pm$ 0.084   | 0.489 $\pm$ 0.101    | 0.489 $\pm$ 0.074   | 0.367 $\pm$ 0.047   | 0.21    |
| Uracil               | 0.818 $\pm$ 0.080   | 1.002 $\pm$ 0.289    | 0.722 $\pm$ 0.086   | 0.364 $\pm$ 0.051   | 0.05    |
| Valerate             | 0.333 $\pm$ 0.045   | 0.344 $\pm$ 0.075    | 0.215 $\pm$ 0.026   | 0.271 $\pm$ 0.040   | 0.25    |
| Valine               | 1.048 $\pm$ 0.117a  | 0.749 $\pm$ 0.144ab  | 0.769 $\pm$ 0.108ab | 0.546 $\pm$ 0.050b  | <0.05   |

Table S5 Plasma metabolite concentration of rats fed milk or yogurt with/without inulin (mM)

| Groups                 | Milk                 | MilkInu              | Yogurt               | YogurtInu            | p value |
|------------------------|----------------------|----------------------|----------------------|----------------------|---------|
| 2-Aminobutyrate        | 0.005±0.000          | 0.004±0.000          | 0.005±0.000          | 0.005±0.000          | 0.25    |
| 3-Hydroxybutyrate      | 0.022±0.004          | 0.024±0.004          | 0.024±0.003          | 0.031±0.007          | 0.61    |
| 3-Methyl-2-Oxovalerate | 0.002±0.000a         | 0.001±0.000a         | 0.003±0.000b         | 0.002±0.000a         | 0.002   |
| Acetate                | <u>0.037±0.002a</u>  | <u>0.051±0.004bc</u> | <u>0.040±0.002ab</u> | <u>0.061±0.005c</u>  | <0.001  |
| Acetoacetate           | 0.022±0.002          | 0.026±0.002          | 0.024±0.002          | 0.029±0.005          | 0.42    |
| Acetone                | 0.003±0.000          | 0.004±0.000          | 0.003±0.000          | 0.004±0.000          | 0.11    |
| Alanine                | 0.261±0.013          | 0.246±0.007          | 0.268±0.017          | 0.259±0.008          | 0.63    |
| Asparagine             | 0.038±0.003          | 0.035±0.001          | 0.037±0.006          | 0.037±0.002          | 0.69    |
| Butyrate               | 0.003±0.000          | 0.002±0.000          | 0.003±0.000          | 0.003±0.000          | 0.16    |
| Choline                | 0.008±0.000          | 0.008±0.000          | 0.008±0.000          | 0.007±0.000          | 0.63    |
| Citrate                | 0.090±0.010          | 0.096±0.004          | 0.087±0.006          | 0.100±0.005          | 0.51    |
| Creatine               | 0.040±0.007          | 0.034±0.005          | 0.042±0.005          | 0.028±0.003          | 0.25    |
| Creatinine             | 0.005±0.001          | 0.005±0.001          | 0.005±0.001          | 0.005±0.000          | 0.91    |
| Dimethyl Sulfone       | 0.002±0.000          | 0.003±0.000          | 0.003±0.000          | 0.002±0.000          | 0.14    |
| Ethanol                | 0.008±0.000a         | 0.013±0.001b         | 0.011±0.001ab        | 0.014±0.001b         | <0.001  |
| Formate                | 0.016±0.001          | 0.020±0.002          | 0.019±0.002          | 0.019±0.002          | 0.48    |
| Glucose                | 4.959±0.109          | 4.931±0.118          | 4.791±0.101          | 5.010±0.513          | 0.66    |
| Glutamate              | 0.045±0.003a         | 0.045±0.003a         | 0.060±0.003b         | 0.052±0.005ab        | 0.023   |
| Glutamine              | 0.216±0.006          | 0.233±0.013          | 0.201±0.008          | 0.230±0.008          | 0.088   |
| Glycine                | 0.055±0.002a         | 0.045±0.002b         | 0.051±0.003ab        | 0.047±0.002ab        | 0.022   |
| Histidine              | 0.027±0.001a         | 0.023±0.001b         | 0.026±0.001ab        | 0.026±0.001ab        | 0.018   |
| Isobutyrate            | <u>0.005±0.001ab</u> | <u>0.005±0.000a</u>  | <u>0.007±0.000b</u>  | <u>0.006±0.001ab</u> | 0.024   |
| Isoleucine             | 0.043±0.003          | 0.037±0.002          | 0.046±0.009          | 0.042±0.002          | 0.064   |
| Lactate                | 0.752±0.074          | 0.747±0.052          | 0.952±0.110          | 0.744±0.072          | 0.20    |
| Leucine                | 0.071±0.005a         | 0.056±0.002b         | 0.071±0.002a         | 0.066±0.003ab        | 0.015   |
| Lysine                 | 0.251±0.008          | 0.239±0.010          | 0.237±0.006          | 0.231±0.008          | 0.38    |
| Methionine             | 0.034±0.002          | 0.034±0.002          | 0.034±0.002          | 0.034±0.003          | 0.99    |
| N,N-Dimethylglycine    | 0.001±0.000          | 0.002±0.000          | 0.001±0.000          | 0.002±0.000          | 0.11    |
| Phenylalanine          | 0.025±0.001ab        | 0.023±0.001a         | 0.027±0.001b         | 0.026±0.001ab        | 0.028   |
| Proline                | 0.114±0.006          | 0.124±0.004          | 0.120±0.007          | 0.129±0.006          | 0.36    |
| Pyruvate               | 0.059±0.004a         | 0.063±0.002a         | 0.080±0.006b         | 0.064±0.004ab        | 0.007   |
| Serine                 | 0.109±0.005          | 0.107±0.003          | 0.113±0.006          | 0.109±0.004          | 0.79    |
| Succinate              | 0.006±0.000          | 0.006±0.000          | 0.006±0.000          | 0.006±0.000          | 0.68    |
| Taurine                | 0.087±0.011          | 0.087±0.010          | 0.114±0.008          | 0.079±0.008          | 0.069   |
| Threonine              | 0.150±0.005          | 0.141±0.005          | 0.141±0.008          | 0.154±0.008          | 0.43    |
| Trimethylamine         | 0.001±0.000          | 0.001±0.000          | 0.001±0.000          | 0.001±0.000          | 0.92    |
| Trimethylamine N-oxide | 0.001±0.000          | 0.001±0.000          | 0.002±0.000          | 0.001±0.000          | 0.37    |
| Tyrosine               | 0.037±0.003          | 0.038±0.002          | 0.039±0.002          | 0.037±0.001          | 0.91    |
| Valine                 | 0.079±0.007          | 0.072±0.002          | 0.083±0.004          | 0.082±0.004          | 0.40    |

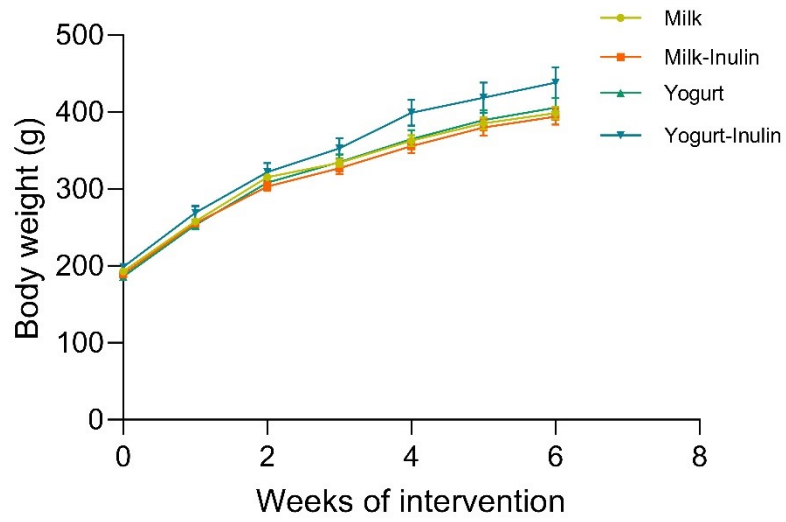

Figure S1. Development in body weight of rats fed with four different diets during a 6-week intervention. Error bars represent SEM.
